# Supplementary material for: Rapid Synthesis of Silver Nanowires in the Polyol Process with Conventional and Microwave Heating
Source: MDPI journal article supplement (doi:10.3390/app13084963), 2023-04-14
Supplement: s1 [file s1]

# Rapid synthesis of silver nanowires in the polyol process with conventional and microwave heating

Grzegorz Dzido, Aleksandra Smolska, Muhammad Omer Farooq

Silesian University of Technology, Department of Chemical Engineering and Process Design,

Strzody 7 st., Gliwice 44-100, Poland

Corresponding author: Grzegorz.Dzido@polsl.pl; tel.: +48 32 2371913

## Electronic Supplementary Materials

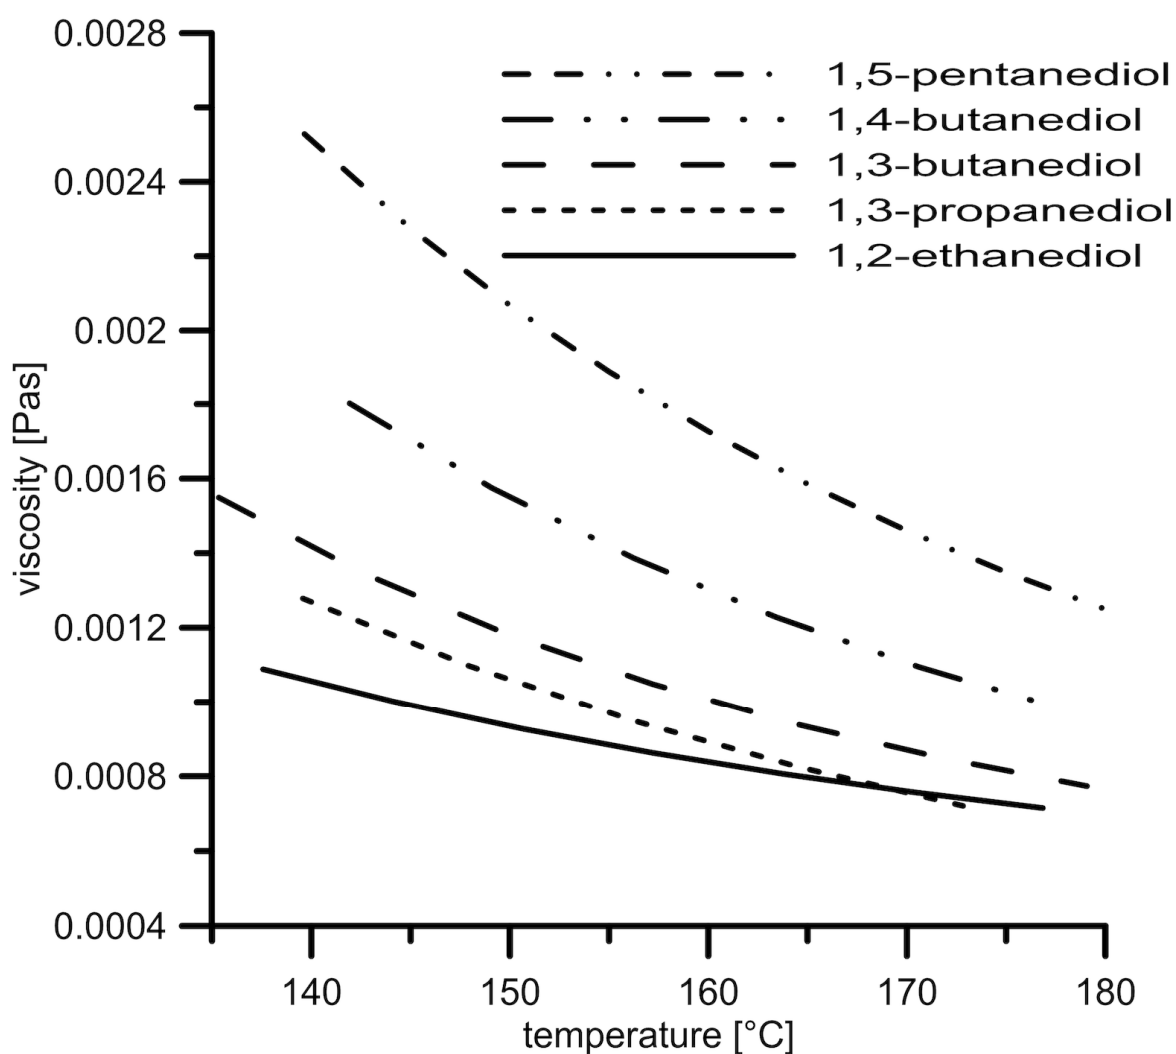

**Figure S1.** Temperature dependence of the viscosity of applied polyols.

**Table S1.** Properties of applied polyols at 20°C.

| Property                                    | 1,2-ethanediol | 1,3-propanediol | 1,3-butanediol | 1,4-butanediol | 1,5-pentanediol |
|---------------------------------------------|----------------|-----------------|----------------|----------------|-----------------|
| Loss tangent<br>tg( $\delta$ )<br>@2.45 GHz | 1.35<br>[37]   | 1.3<br>[38]     | 0.9<br>[39]    | 0.783<br>[37]  | 0.456<br>[37]   |
| Dielectric<br>constant $\epsilon'$<br>[40]  | 41.4           | 35.1            | 29.6           | 32.9           | 26.2            |
